# Supplementary material
Source: PubMed Central journal article supplement (PMC3168315)
Supplement: supp_amiajnl-2011-000163_JAMIA_Appendix_000163.pdf [file supp_amiajnl-2011-000163_JAMIA_Appendix_000163.pdf]

## Appendix

| D | C    | Precision | Recall | F-measure |
|---|------|-----------|--------|-----------|
| 1 | 0.01 | 0.5951    | 0.1255 | 0.2072    |
|   | 0.1  | 0.7676    | 0.5038 | 0.6082    |
|   | 1    | 0.7917    | 0.7181 | 0.7531    |
|   | 10   | 0.7356    | 0.6973 | 0.7159    |
|   | 100  | 0.6717    | 0.663  | 0.6674    |
| 2 | 0.01 | 0.7775    | 0.4532 | 0.5724    |
|   | 0.1  | 0.8178    | 0.6891 | 0.7478    |
|   | 1    | 0.8139    | 0.6874 | 0.7451    |
|   | 10   | 0.814     | 0.6873 | 0.7452    |
|   | 100  | 0.8139    | 0.6873 | 0.7451    |
| 3 | 0.01 | 0.8219    | 0.6339 | 0.7155    |
|   | 0.1  | 0.8208    | 0.6351 | 0.7158    |
|   | 1    | 0.8207    | 0.6351 | 0.7159    |
|   | 10   | 0.8208    | 0.6352 | 0.716     |
|   | 100  | 0.8208    | 0.6351 | 0.7159    |
| 4 | 0.01 | 0.8273    | 0.578  | 0.6801    |
|   | 0.1  | 0.8273    | 0.5779 | 0.6801    |
|   | 1    | 0.8273    | 0.5779 | 0.6801    |
|   | 10   | 0.8273    | 0.578  | 0.6801    |
|   | 100  | 0.8273    | 0.578  | 0.6801    |

**Table 1.** Results of parameter optimization for SVM-based NER module with baseline features using the training set. Reported numbers are averages from 5-fold cross validation. Major SVM parameters to optimize include the degree of the polynomial kernel function (D) and the cost (C) used in the optimization step of learning. Although the highest F-measure was achieved at D=1 and C=1. We decided to use D=2 and C=0.1 in this study, because the model performance was more stable among different values of C when D was 2.

| <b>Feature Set</b>                                                                               | <b>Pre</b>    | <b>Rec</b>    | <b>F-measure</b> |
|--------------------------------------------------------------------------------------------------|---------------|---------------|------------------|
| Baseline (bag-of-word + previous_history)                                                        | 0.8139        | 0.6874        | 0.7478           |
| Baseline + POS                                                                                   | 0.8079        | 0.7084        | 0.7549           |
| Baseline + orthographic                                                                          | 0.8047        | 0.7069        | 0.7525           |
| Baseline + prefix&suffix                                                                         | 0.7904        | 0.7138        | 0.7501           |
| Baseline + (POS + Orthographic + prefix&suffix)                                                  |               |               |                  |
| Baseline + (POS + Orthographic + prefix&suffix) + MedLEE                                         | 0.8362        | 0.7928        | 0.8139           |
| Baseline + (POS + Orthographic + prefix&suffix) + KnowledgeMap                                   | 0.8249        | 0.7718        | 0.7974           |
| Baseline + (POS + Orthographic + prefix&suffix) + DST                                            | 0.8294        | 0.7846        | 0.8064           |
| Baseline + (POS + Orthographic + prefix&suffix) + (MedLEE + KnowledgeMap + DST)                  | <b>0.8507</b> | <b>0.8153</b> | <b>0.8326</b>    |
| Baseline + (POS + Orthographic + prefix&suffix) + (MedLEE + KnowledgeMap + DST) + source&section | 0.8460        | 0.8024        | 0.8236           |

**Table 2.** Results of SVM-based NER module on the training set (using a 5-fold cross validation), when different sets of features were used. The “previous history” features, which are labels of preceding words, assigned by the NER system itself, was implemented in the TinySVM package. POS – part of speech; MedLEE, KnowledgeMap, and DST – three NLP systems used in this study.

| <b>Class Name</b>            | <b>precision</b> | <b>recall</b> |
|------------------------------|------------------|---------------|
| Absent                       | 0.9623           | 0.9459        |
| associated_with_someone_else | 0.9623           | 0.7822        |
| Conditional                  | 0.7139           | 0.2697        |
| Hypothetical                 | 0.9390           | 0.8724        |
| Possible                     | 0.7608           | 0.5925        |
| Present                      | 0.9430           | 0.9766        |

**Table 3.** Results of Assertion Classifier by class, using i2b2/VA test data set.
